# Supplementary material for: Meta-Analysis and Bioinformatics Detection of Susceptibility Genes in Diabetic Nephropathy
Source: Int J Mol Sci. 2021 Dec 21;23(1):20. doi: 10.3390/ijms23010020 (PMC8744540; doi:10.3390/ijms23010020)
Supplement: Supplementary file 1 [file ijms-23-00020-s001.zip › Supplementary Figures.pdf]

## Supplementary Figures

### T1DM

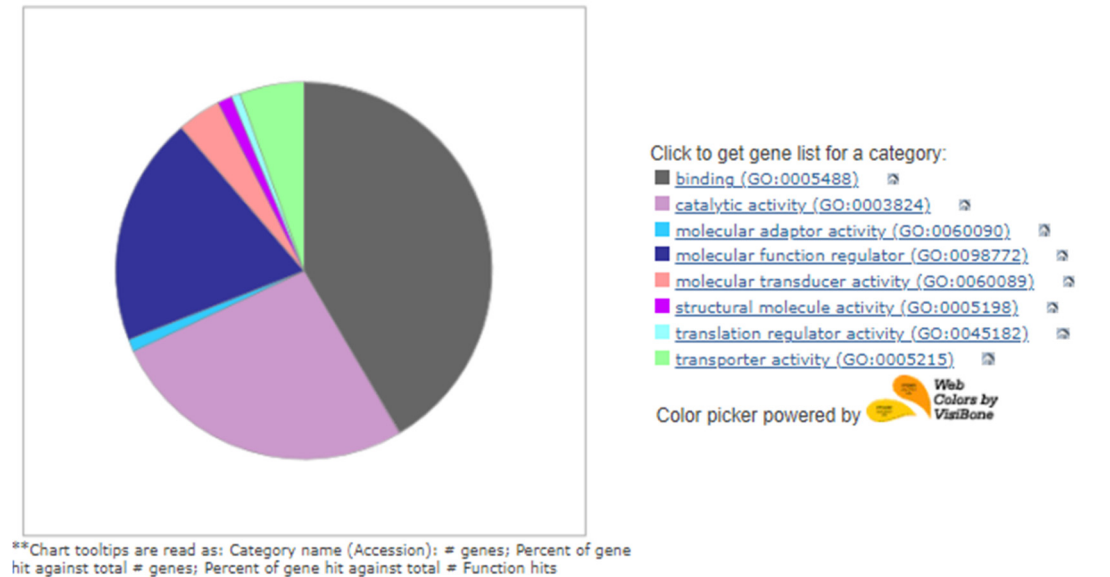

**Figure S1:** Results of the gene ontology analysis regarding the “molecular function” category.

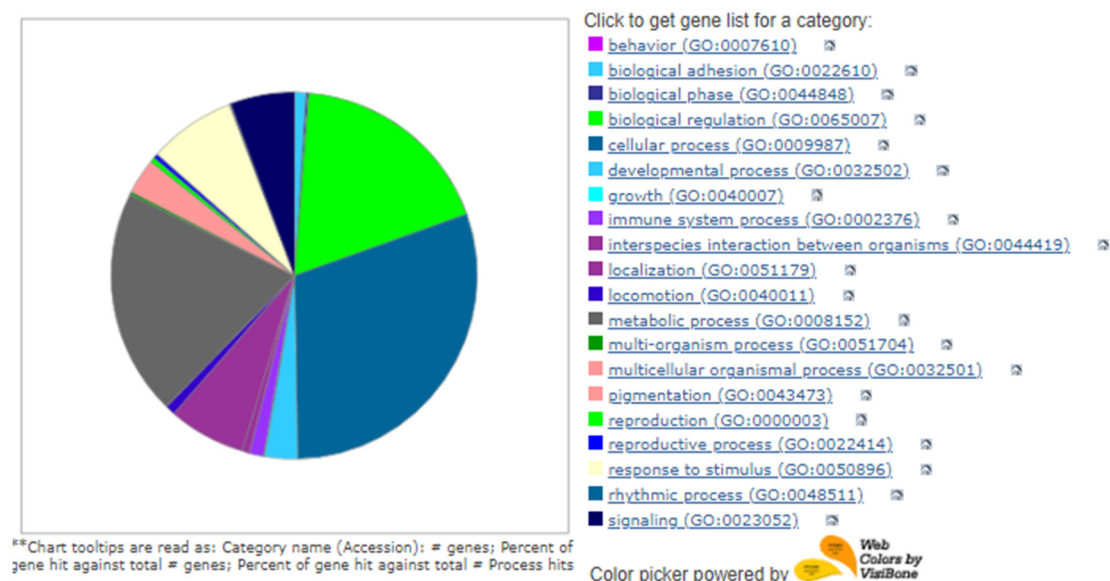

**Figure S2:** Results of the gene ontology analysis regarding the “biological process” category.

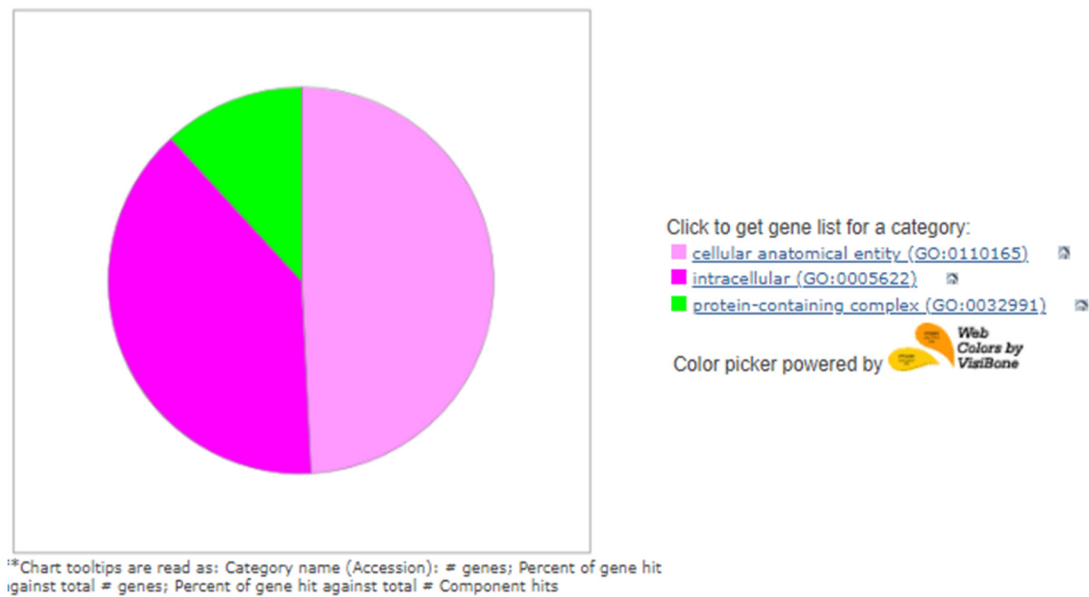

**Figure S3:** Results of the gene ontology analysis regarding the “cellular component” category.

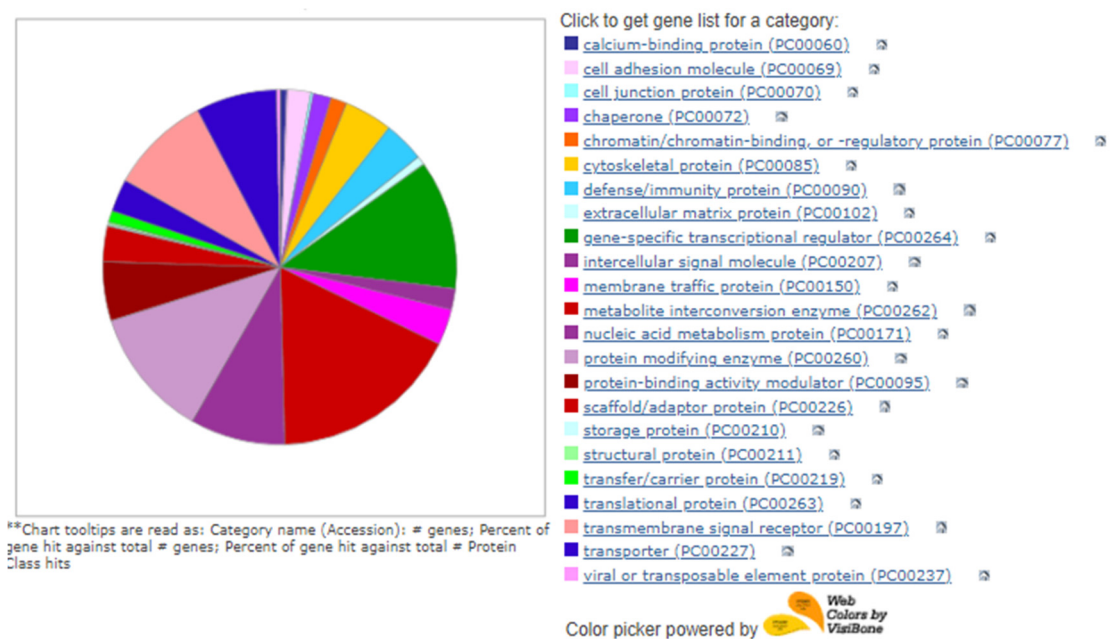

**Figure S4:** Results of the gene ontology analysis regarding the “protein class” category.

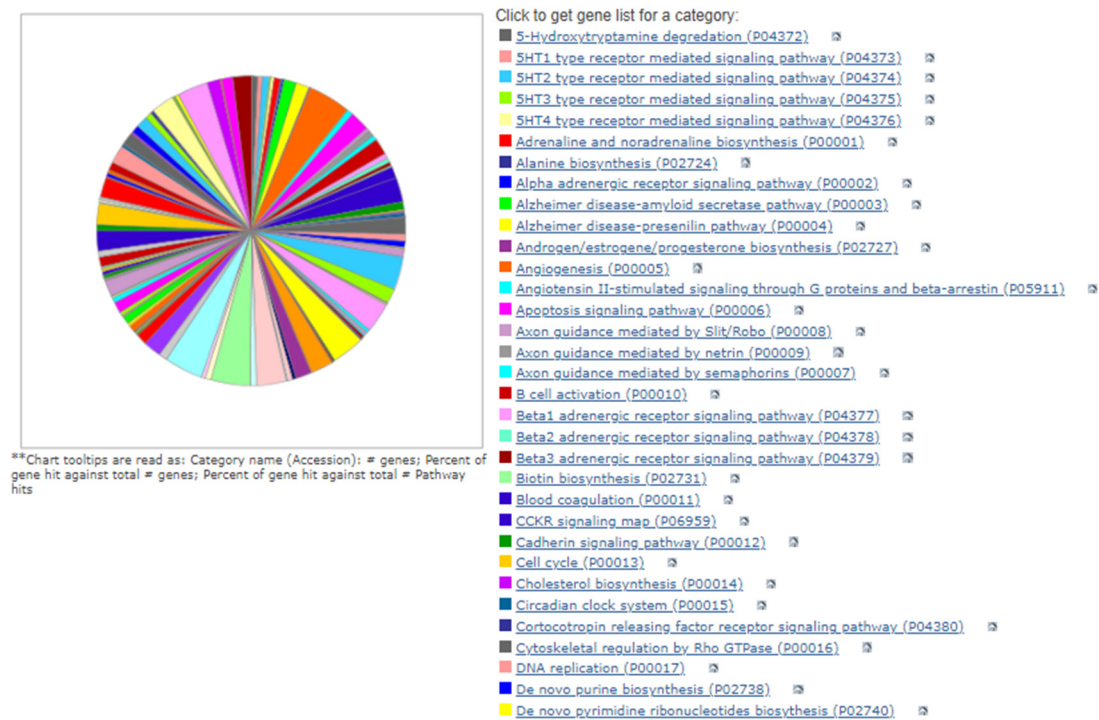

**Figure S5:** Results of the gene ontology analysis regarding the “pathway” category.

## T2DM

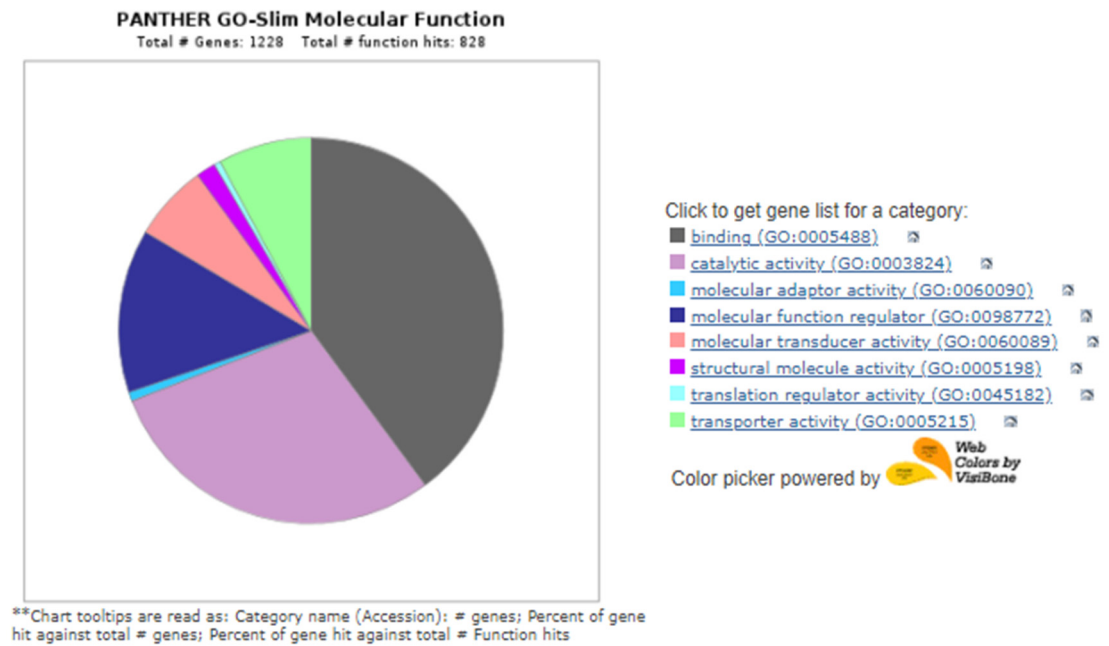

**Figure S6:** Results of the gene ontology analysis regarding the “molecular function” category.

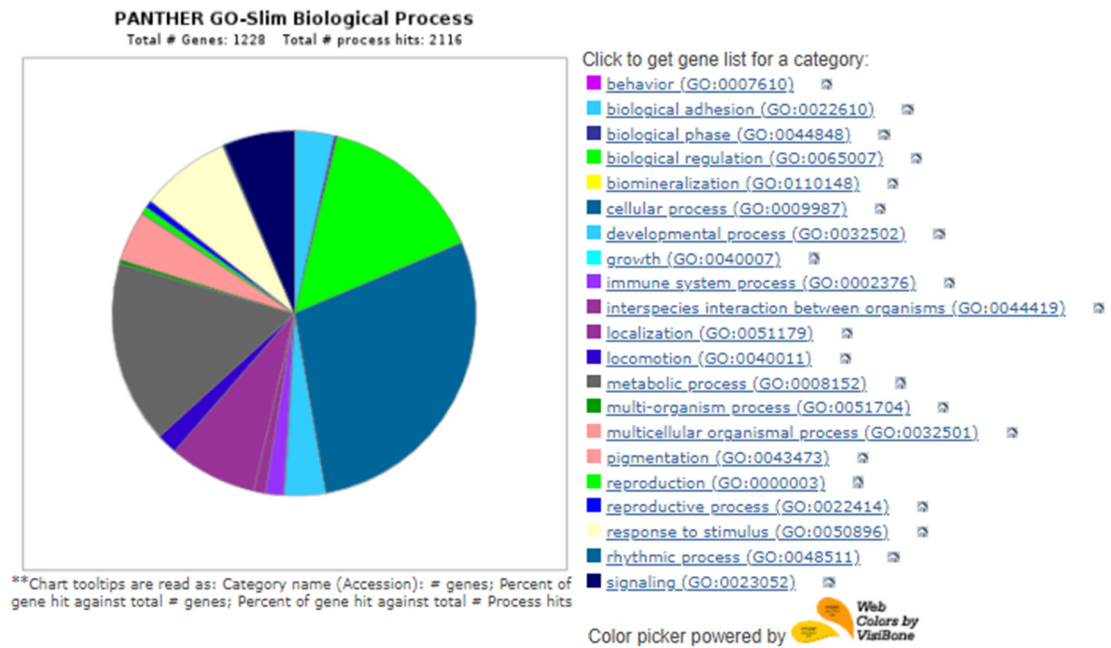

**Figure S7:** Results of the gene ontology analysis regarding the “biological process” category.

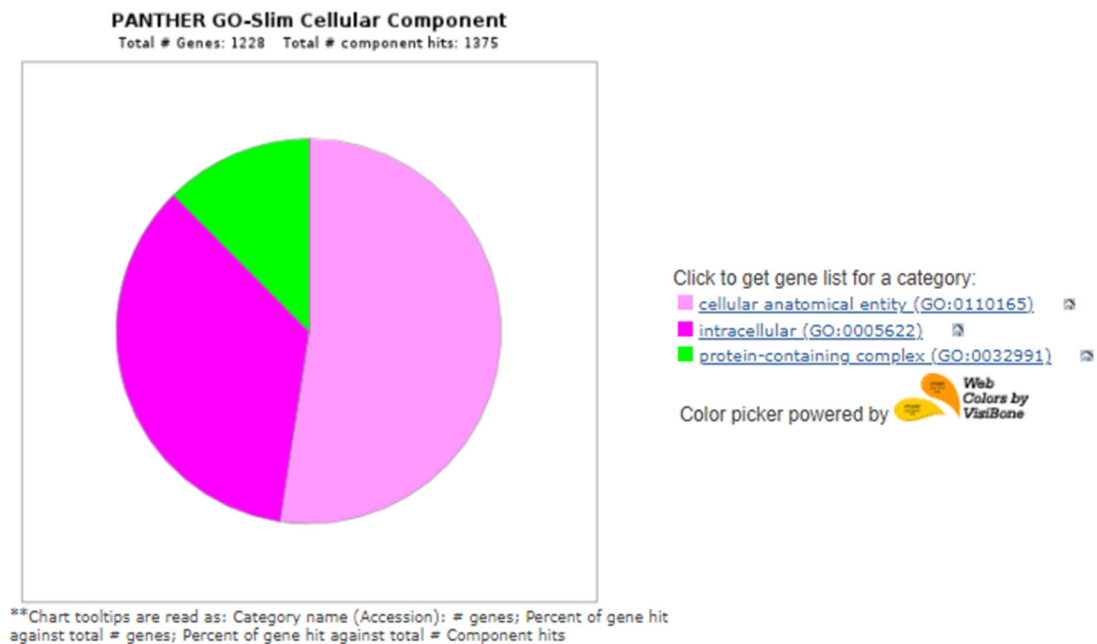

**Figure S8:** Results of the gene ontology analysis regarding the “cellular component” category.

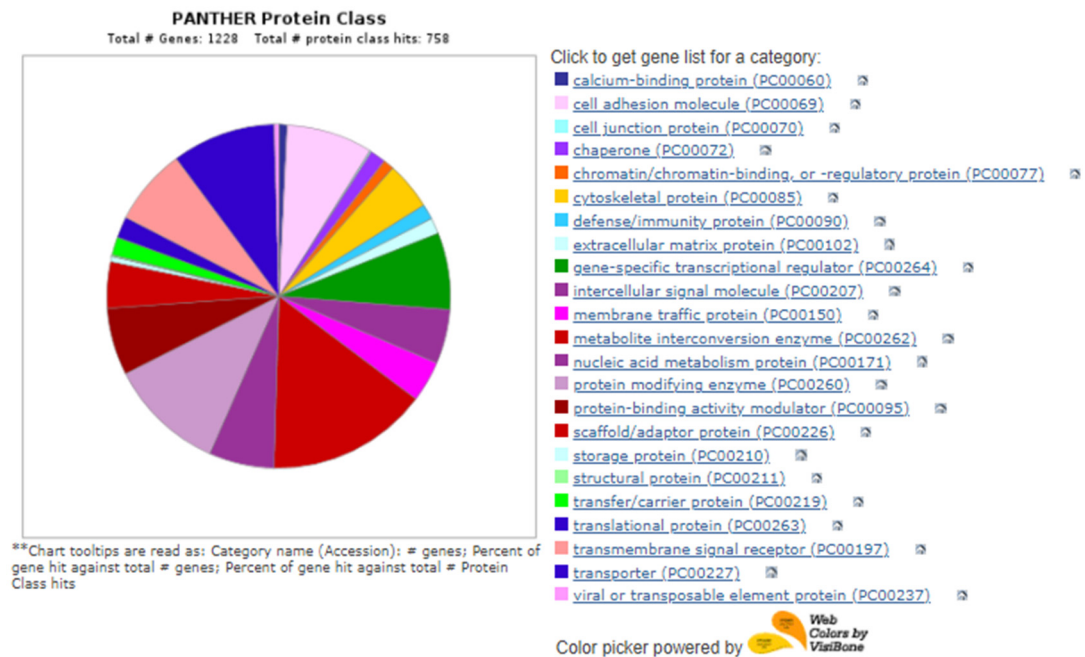

**Figure S9:** Results of the gene ontology analysis regarding the “protein class” category.

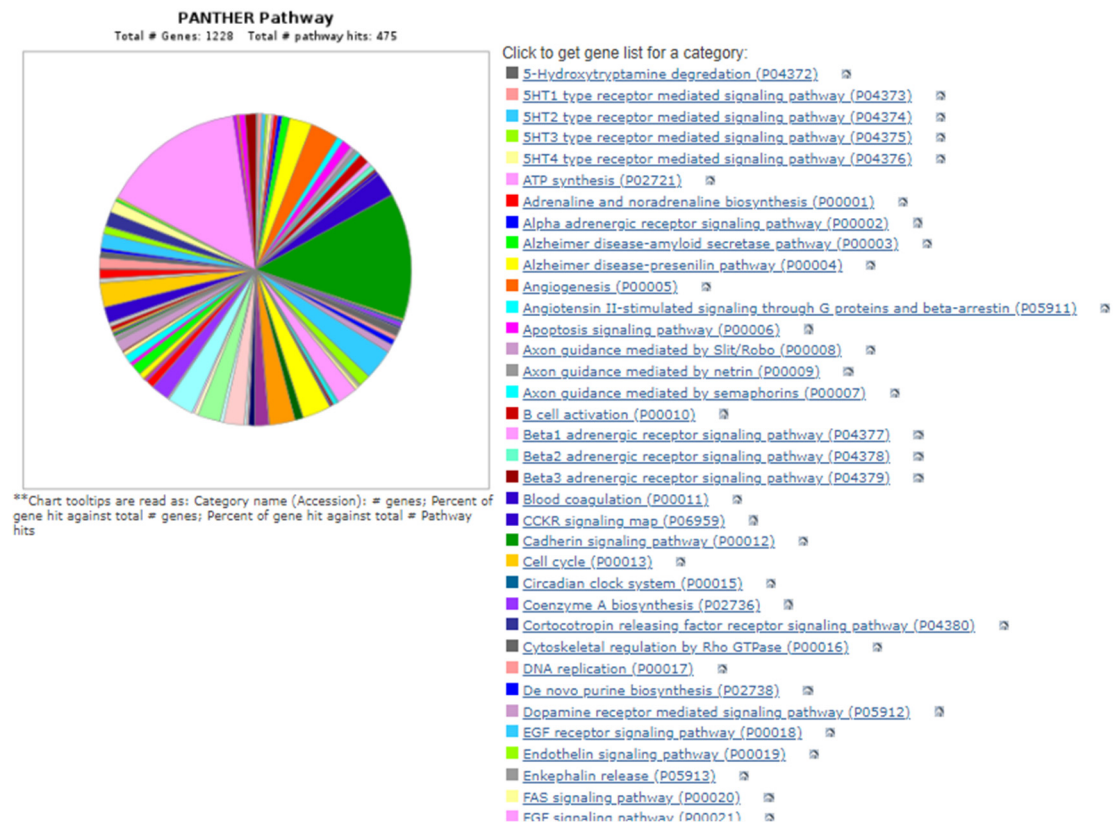

**Figure S10:** Results of the gene ontology analysis regarding the “pathway” category.
