# Supplementary material for: Meta-Analysis and Bioinformatics Detection of Susceptibility Genes in Diabetic Nephropathy
Source: Int J Mol Sci. 2021 Dec 21;23(1):20. doi: 10.3390/ijms23010020 (PMC8744540; doi:10.3390/ijms23010020)
Supplement: Supplementary file 1 [file ijms-23-00020-s001.zip › Supplementary Tables.pdf]

**Table S1:** The common genes between type 1 diabetes mellitus (T1DM) and type 1 diabetes mellitus (T2DM).

|                               |                                                                                                                                                                                                                                                                                                                                                                                                                                                                                                                                                                                                                                                                                                                                                                                                                                                                                                                                                                                                                                                                                                                                                                                                                                                                                                                                                                                                                                                                                                                                                                                                                                                                                                                                                                                                                                                                                       |
|-------------------------------|---------------------------------------------------------------------------------------------------------------------------------------------------------------------------------------------------------------------------------------------------------------------------------------------------------------------------------------------------------------------------------------------------------------------------------------------------------------------------------------------------------------------------------------------------------------------------------------------------------------------------------------------------------------------------------------------------------------------------------------------------------------------------------------------------------------------------------------------------------------------------------------------------------------------------------------------------------------------------------------------------------------------------------------------------------------------------------------------------------------------------------------------------------------------------------------------------------------------------------------------------------------------------------------------------------------------------------------------------------------------------------------------------------------------------------------------------------------------------------------------------------------------------------------------------------------------------------------------------------------------------------------------------------------------------------------------------------------------------------------------------------------------------------------------------------------------------------------------------------------------------------------|
| Genes common in T1DM and T2DM | <p> <i>TFIP11, CCDC116, APOL2, DDT, NCF4, HIC2, SPECC1L, TTC37, CCT8L2, PCSK1, RNF185, SUSP2, CHD1, SYN3, TANGO2, GGT2, SLC25A46, CECR2, RFPL2, PRR16, ARL14EPL, RIMBP3B, NEFH, TMEM191C, FAM174A, ST8SIA4, PIWIL3, CETN3, GAS2L1, TICAM2, TEX43, FTMT, CEP120, CRYBA4, DEPDC5, ZMAT5, LIF, NUDT12, HPS4, INPP5J, ZNF70, PJA2, IGLL1, DUSP18, RTCB, RIMBP3, MEGF10, CLTCL1, SLC25A18, YWHAH, CRYBB3, CCDC188, TMED7, TEX33, EIF3D, POLR3G, SNCAIP, GAB4, FAM81B, RANBP1, PEX26, OSM, GGTLC2, SLC7A4, YTHDC2, CACNG2, PRDM6, IGLL5, USP18, HSCB, PGGT1B, SPATA9, KCTD17, MCM5, DMXL1, YPEL1, ARSK, GAL3ST1, SRRD, APOL1, SCARF2, UBE2L3, ATP6V1E1, DTWD2, TMEM121B, TPST2, ZNF74, FBXO7, HMGXB4, TBC1D10A, XKR3, SLC6A1, PES1, ZNF608, MMP11, CABP7, SNAP29, PHAX, HORMAD2, DGCR8, GGT1, PAM, HMOX1, ERAP2, FEM1C, EFNA5, ADA2, LMNB1, RSPH14, CCDC117, C5orf63, RFPL3, MAPK1, UQCR10, GP1BB, APOL5, VPREB1, GNAZ, SF3A1, LVRN, BCR, DRICH1, RIOK2, UPB1, UFD1, ZNRF3, C1QTNF6, SFI1, AP1B1, ESS2, PVALB, STARD4, GSC2, EIF4ENIF1, CDC45, MTFP1, CABIN1, FER, CHEK2, USP41, IL17RA, FBXL17, MCC, CAMK4, TST, LYSMD3, CHCHD10, GLRX, MED15, RBFox2, ZNF474, CASTOR1, SEC14L2, ISX, SMTN, IFT27, SEC14L6, SEZ6L, VCAN, TSLP, GPR150, CCDC157, OSBP2, LOX, GUCD1, PPIP5K2, KCNN2, DDTL, RASA1, NREP, FAM170A, C22orf39, ASPHD2, PPIC, LRRC75B, ATG12, AIFM3, TMEM232, TMEM211, C22orf15, SDF2L1, TSSK2, TXN2, GRAMD2B, COX7C, APC, CTXN3, TCN2, ZNF280A, TRIM36, RGL4, GGT5, COMT, SLC5A4, TRMT2A, RTL10, MCTP1, MEF2C, DERL3, BID, RGMB, EPB41L4A, LZTR1, ARVCF, THOC5, NR2F1, TOP3B, TIMP3, LNPEP, APOL6, RTN4R, SLC25A1, PI4KA, SMARCB1, RASD2, MYH9, HSD17B4, APOL4, RNF215, ADORA2A, GRK3, NIPSNAP1, TMEM161B, ERAP1, HIRA, TMPRSS6, GNB1L, BPIFC, SEC14L3, TXNRD2, PRR14L, POU5F2, EMID1, C22orf42, P2RX6, SGSM1, GGTLC3, TMEM191B, YDJC, WDR36, ASCC2, TBX1, SNX2, GSTT2,</i> </p> |
|-------------------------------|---------------------------------------------------------------------------------------------------------------------------------------------------------------------------------------------------------------------------------------------------------------------------------------------------------------------------------------------------------------------------------------------------------------------------------------------------------------------------------------------------------------------------------------------------------------------------------------------------------------------------------------------------------------------------------------------------------------------------------------------------------------------------------------------------------------------------------------------------------------------------------------------------------------------------------------------------------------------------------------------------------------------------------------------------------------------------------------------------------------------------------------------------------------------------------------------------------------------------------------------------------------------------------------------------------------------------------------------------------------------------------------------------------------------------------------------------------------------------------------------------------------------------------------------------------------------------------------------------------------------------------------------------------------------------------------------------------------------------------------------------------------------------------------------------------------------------------------------------------------------------------------|

|  |                                                                                                                                                                                                                                                                                                                                                                                                                                                                                                                                                                                                                                                                                                                                                                                                                   |
|--|-------------------------------------------------------------------------------------------------------------------------------------------------------------------------------------------------------------------------------------------------------------------------------------------------------------------------------------------------------------------------------------------------------------------------------------------------------------------------------------------------------------------------------------------------------------------------------------------------------------------------------------------------------------------------------------------------------------------------------------------------------------------------------------------------------------------|
|  | <p>SELENOM, MAN2A1, RFESD, ALDH7A1, TOM1, GSTT4, RAB36, BCL2L13, DRG1, SRP19, CCDC192, PRRC1, LIX1, SERPIND1, C22orf31, SEMA6A, LIMK2, MVP, PLA2G3, EDIL3, SEPTIN5, ZDHHC8, MN1, CLDN5, CDO1, FOXRED2, TUBA8, KREMEN1, MB, GSTT2B, SLC35E4, TTC28, LARGE1, REEP5, ARRDC3, KIAA1671, THAP7, LRRC74B, PRODH, COMMD10, CRYBB1, PPIL2, KLHL22, TNFAIP8, VPREB3, OR11H1, PATZ1, MICAL3, FAM172A, DCP2, GIN1, MRPL40, TMED7-TICAM2, AP3S1, ZNF280B, XBP1, CCNH, RASL10A, DGCR6, MBLAC2, SLF1, DGCR6L, POTEH, CSNK1G3, EWSR1, SRFBP1, TSSK1B, MARCHF3, HDHD5, RHOBTB3, SEC14L4, SLC5A1, PPM1F, SNRPD3, MIF, RHBDD3, SNX24, MORC2, ELL2, PRAME, CRYBB2, RIMBP3C, ADGRV1, NF2, CAST, MTMR3, DGCR2, CRKL, MYO18B, CCDC112, APOL3, IL2RB, SLCO4C1, PITPNB, PISD, CSF2RB, KIAA0825, HAPLN1, RFPL1, SLC2A11, PIK3IP1, MPST</p> |
|--|-------------------------------------------------------------------------------------------------------------------------------------------------------------------------------------------------------------------------------------------------------------------------------------------------------------------------------------------------------------------------------------------------------------------------------------------------------------------------------------------------------------------------------------------------------------------------------------------------------------------------------------------------------------------------------------------------------------------------------------------------------------------------------------------------------------------|

**Table S2:** CytoHubba results regarding the next top 10 hub genes in T1DM and T2DM protein networks.

| Official Gene Symbol | Official Full Name                             | Score | Cytogenetic location |
|----------------------|------------------------------------------------|-------|----------------------|
| <b>T1DM</b>          |                                                |       |                      |
| PIK3R1               | phosphoinositide-3-kinase regulatory subunit 1 | 29    | 5q13.1               |
| MAPK3                | mitogen-activated protein kinase 3             | 29    | 16p11.2              |
| MRPS7                | mitochondrial ribosomal protein S7             | 28    | 17q25.1              |
| NSA2                 | NSA2 ribosome biogenesis factor                | 27    | 5q13.3               |
| RPL18                | ribosomal protein L18                          | 27    | 19q13.33             |
| RPL13A               | ribosomal protein L13a                         | 27    | 19q13.33             |
| SNRPD3               | small nuclear ribonucleoprotein D3 polypeptide | 27    | 22q11.23             |
| MAPK1                | mitogen-activated protein kinase 1             | 27    | 22q11.22             |
| RPL38                | ribosomal protein L38                          | 25    | 17q25.1              |
| MTREX (SKIV2L2)      | Mtr4 exosome RNA helicase                      | 23    | 5q11.2               |
| <b>T2DM</b>          |                                                |       |                      |
| PPP2CA               | protein phosphatase 2 catalytic subunit alpha  | 16    | 5q31.1               |
| CFTR                 | CF transmembrane conductance regulator         | 16    | 7q31.2               |
| SNRPN                | small nuclear ribonucleoprotein polypeptide N  | 16    | 15q11.2              |
| RPS14                | ribosomal protein S14                          | 15    | 5q33.1               |

|        |                                                         |    |          |
|--------|---------------------------------------------------------|----|----------|
| PDGFRB | platelet derived growth factor receptor beta            | 14 | 5q32     |
| COMT   | catechol-O-methyltransferase                            | 14 | 22q11.21 |
| CAMK2A | calcium/calmodulin dependent protein<br>kinase II alpha | 14 | 5q32     |
| IL4    | interleukin 4                                           | 14 | 5q31.1   |
| HSPA9  | heat shock protein family A (Hsp70) member<br>9         | 14 | 5q31.2   |
| UBE2D2 | ubiquitin conjugating enzyme E2 D2                      | 14 | 5q31.2   |
